# Supplementary material
Source: PubMed Central journal article supplement (PMC3061531)
Supplement: supp_110.175117_JPET175117Supplemental_Figure_1.pdf [file supp_110.175117_JPET175117Supplemental_Figure_1.pdf]

# meso-Transdiene Analogs Inhibit Vesicular Monoamine Transporter-2 Function and Methamphetamine-evoked Dopamine Release

David B. Horton, Kiran B. Siripurapu, Seth D. Norrholm, John P. Culver, Marhaba Hojahmat, Joshua S. Beckmann, Steven B. Harrod<sup>2</sup>, Agripina G. Deaciuc, Michael T. Bardo, Peter A. Crooks and Linda P. Dwoskin

JPET # 175117

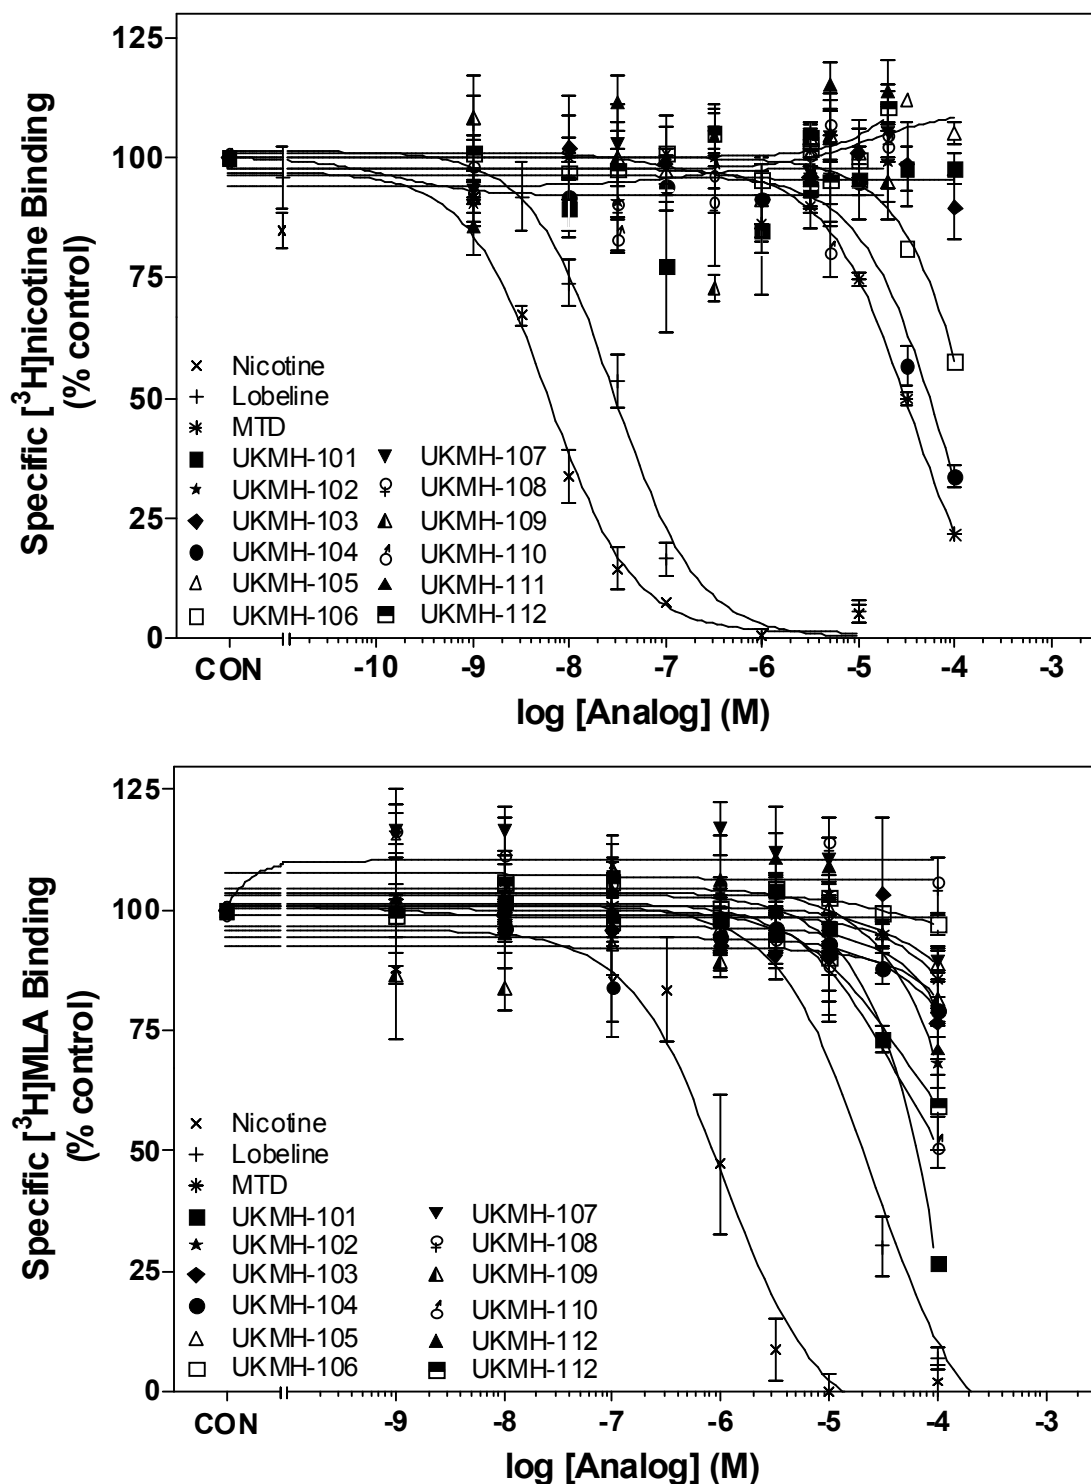

Supp. Fig 1. MTD analogs do not inhibit [<sup>3</sup>H]nicotine binding (top panel) and [<sup>3</sup>H]MLA binding (bottom panel) to whole brain membranes. Nonspecific [<sup>3</sup>H]nicotine binding and nonspecific [<sup>3</sup>H]MLA binding were determined in the presence of 10  $\mu$ M cytosine and 10  $\mu$ M nicotine, respectively. Control represents [<sup>3</sup>H]nicotine and [<sup>3</sup>H]MLA binding in the absence of analog ( $56.8 \pm 4.22$  and  $69.7 \pm 2.67$  fmol/mg protein, respectively).  $n = 3-4$  rats/analog.
